# Supplementary material for: Ancient DNA Reveals That the Genetic Structure of the Northern Han Chinese Was Shaped Prior to 3,000 Years Ago
Source: PubMed Central journal article supplement (PMC4418768; doi:10.1371/journal.pone.0125676), 2015-05-04
Supplement: pone.0125676.s005.pdf [file pone.0125676.s005.pdf]

Table S1 Characteristics of samples excavated from the Hengbei site.

| Burial number | Sample number          | Sample information | Age at death | Sex        |           | Mitochondrial DNA amplification              | Y chromosome SNP |
|---------------|------------------------|--------------------|--------------|------------|-----------|----------------------------------------------|------------------|
|               |                        |                    |              | Morphology | Molecular |                                              |                  |
| M1002         | M1002                  | Tomb master        | 30±          | Female     | Fail      | Fail                                         | -                |
| M1004         | M1004                  | Tomb master        | 25-30        | Male       | Male      | Success                                      | Fail             |
| M1006         | M1006 <sup>a</sup>     | Tomb master        | 40±          | Male       | Male      | Success                                      | Success          |
|               | M1006i                 | Immolated slave    | 13-14        | ?          | Fail      | Fail                                         | -                |
| M1007         | M1007                  | Tomb master        | 25±          | Male       | Male      | Success                                      | Success          |
| M1009         | M1009                  | Tomb master        | ?            | ?          | Fail      | Fail                                         | -                |
|               | M1009i                 | Immolated slave    | 11-12        | ?          | Male      | Success                                      | Success          |
|               | M1009iii <sup>ab</sup> | Immolated slave    | 16-17        | Female     | Female    | Success                                      | -                |
| M1010         | M1010                  | Tomb master        | 30±          | Female     | Female    | Success                                      | -                |
| M1011         | M1011                  | Tomb master        | ?            | ?          | Fail      | Fail                                         | -                |
|               | M1011i                 | Immolated slave    | 25-30        | Female     | Fail      | Fail                                         | -                |
|               | M1011ii                | Immolated slave    | 16-17        | ?          | Fail      | Fail                                         | -                |
|               | M1011iii               | Immolated slave    | 30-35        | Male       | Fail      | Fail                                         | -                |
|               | M1011v                 | Immolated slave    | 16-17        | Male       | Fail      | Success                                      | -                |
| M2002         | M2002 <sup>b</sup>     | Tomb master        | 34-36        | Male       | Female    | Success                                      | -                |
|               | M2002i                 | Immolated slave    | 16-17        | Male       | Female    | Success                                      | Fail             |
| M2003         | M2003                  | Tomb master        | 35-40        | Female     | Female    | Success                                      | -                |
| M2006         | M2006 <sup>a</sup>     | Tomb master        | 45±          | Male       | Male      | Success                                      | Success          |
|               | M2006i <sup>b</sup>    | Immolated slave    | 13-14        | ?          | Male      | Success                                      | Success          |
| M2007         | M2007                  | Tomb master        | ?            | ?          | Fail      | Fail                                         | -                |
|               | M2007ii                | Immolated slave    | adult        | Male       | Male      | Success                                      | Success          |
|               | M2007iii               | Immolated slave    | 25-30        | Male       | Male      | Success                                      | Success          |
| M2021         | M2021                  | Tomb master        | 25±          | Female     | Female    | Success                                      | -                |
|               | M2021i                 | Immolated slave    | 20±          | Female     | Fail      | Fail                                         | -                |
| M2036         | M2036                  | Tomb master        | 30-35        | Male       | Male      | Success                                      | Success          |
|               | M2036i <sup>b</sup>    | Immolated slave    | 13-14        | ?          | Male      | Success                                      | Success          |
|               | M2036ii                | Immolated slave    | 17-18        | Male       | Female    | Success                                      | Fail             |
|               | M2036iii               | Immolated slave    | 12-13        | ?          | Female    | Success                                      | -                |
| M2044         | M2044                  | Tomb master        | 45±          | Male       | Male      | Success                                      | Success          |
| M2045         | M2045                  | Tomb master        | 30±          | Male       | Male      | Success                                      | Success          |
| M2049         | M2049                  | Tomb master        | 30-35        | Male       | Male      | Success                                      | Success          |
|               | M2049i                 | Immolated slave    | 20±          | Female     | Female    | Success                                      | -                |
| M2053         | M2053                  | Tomb master        | 16-17        | Female     | Female    | Success                                      | -                |
| M2055         | M2055                  | Tomb master        | 35-40        | Male       | Male      | Success                                      | Success          |
|               | M2055i                 | Immolated slave    | 25-30        | Male       | Male      | Success                                      | Success          |
|               | M2055ii                | Immolated slave    | 14-15        | ?          | Female    | Showed the same sequence as the researcher   | -                |
| M2060         | M2060                  | Tomb master        | 30-35        | ?          | Fail      | Fail                                         | -                |
| M2077         | M2077                  | Tomb master        | 20-25        | Male       | Fail      | Fail                                         | -                |
| M2083         | M2083                  | Tomb master        | 25±          | Male       | Male      | Success                                      | Success          |
| M2084         | M2084 <sup>ab</sup>    | Tomb master        | 30±          | Male       | Male      | Success                                      | Success          |
| M2089         | M2089                  | Tomb master        | ?            | ?          | Male      | Success                                      | Success          |
| M2107         | M2107                  | Tomb master        | 16-17        | Female     | Female    | Success                                      | -                |
| M2129         | M2129                  | Tomb master        | 21-29        | Female     | Fail      | Fail                                         | -                |
|               | M2129i <sup>b</sup>    | Immolated slave    | 14-15        | ?          | Female    | Success                                      | -                |
|               | M2129ii                | Immolated slave    | 6-7          | ?          | Female    | Success                                      | -                |
|               | M2129iii <sup>a</sup>  | Immolated slave    | 16-17        | Male       | Fail      | No consistent result obtained by replication | -                |
| M2144         | M2144                  | Tomb master        | 25-30        | Female     | Female    | Success                                      | -                |
|               | M2144i                 | Immolated slave    | 11-12        | ?          | Fail      | Success                                      | -                |

|       |                      |                 |       |        |        |                                              |         |
|-------|----------------------|-----------------|-------|--------|--------|----------------------------------------------|---------|
|       | M2144ii              | Immolated slave | 14-15 | ?      | Fail   | Success                                      | -       |
| M2146 | M2146                | Tomb master     | ?     | ?      | Fail   | Fail                                         | -       |
|       | M2146i               | Immolated slave | 5±    | ?      | Fail   | Success                                      | -       |
|       | M2146ii              | Immolated slave | 10-11 | ?      | Fail   | Success                                      | -       |
|       | M2146iii             | Immolated slave | 20±   | Female | Fail   | Success                                      | -       |
|       | M2146iv              | Immolated slave | 30-35 | Female | Fail   | Fail                                         | -       |
| M2147 | M2147                | Tomb master     | 16-17 | Female | Female | Success                                      | -       |
| M2149 | M2149                | Tomb master     | 25    | Female | Female | Success                                      | -       |
| M2150 | M2150                | Tomb master     | ?     | ?      | Fail   | Fail                                         | -       |
|       | M2150i               | Immolated slave | 25±   | Male   | Fail   | Success                                      | -       |
|       | M2150ii <sup>b</sup> | Immolated slave | 22±   | Female | Female | Success                                      | -       |
|       | M2150iii             | Immolated slave | 20-25 | Male   | Fail   | Fail                                         | -       |
| M2155 | M2155 <sup>b</sup>   | Tomb master     | 35-40 | Male   | Female | Success                                      | Fail    |
| M2158 | M2158 <sup>b</sup>   | Tomb master     | 35-40 | Male   | Male   | Success                                      | Success |
|       | M2158i               | Immolated slave | 25-30 | Female | Fail   | Fail                                         | -       |
|       | M2158ii              | Immolated slave | 10±   | ?      | Fail   | Success                                      | -       |
|       | M2158iii             | Immolated slave | 25-30 | Male   | Male   | Success                                      | Success |
| M2159 | M2159                | Tomb master     | 25-30 | Male   | Fail   | Fail                                         | -       |
| M2161 | M2161                | Tomb master     | ?     | ?      | Fail   | Fail                                         | -       |
| M2170 | M2170 <sup>b</sup>   | Tomb master     | 16-17 | Male   | Female | Success                                      | Fail    |
| M2286 | M2286                | Tomb master     | ?     | ?      | Male   | Success                                      | Success |
| M3005 | M3005 <sup>a</sup>   | Tomb master     | 20    | Female | Female | No consistent result obtained by replication | -       |
| M3012 | M3012                | Tomb master     | 25    | Male   | Male   | Success                                      | Fail    |
| M3016 | M3016                | Tomb master     | 20-25 | Male   | Male   | Success                                      | Success |
| M3027 | M3027                | Tomb master     | 30    | Male   | Male   | No consistent result obtained by replication | -       |
| M3039 | M3039 <sup>a</sup>   | Tomb master     | 20    | Female | Female | Success                                      | -       |
| M3046 | M3046 <sup>a</sup>   | Tomb master     | 45-50 | Male   | Male   | Success                                      | Success |
| M3051 | M3051                | Tomb master     | 25-30 | Female | Female | Success                                      | -       |
| M3095 | M3095                | Tomb master     | 25-30 | Female | Fail   | Fail                                         | -       |
| M3099 | M3099                | Tomb master     | 30    | Female | Female | Success                                      | -       |
| M3124 | M3124                | Tomb master     | 14-15 | ?      | Female | Success                                      | -       |
| M3147 | M3147                | Tomb master     | 20-25 | Male   | Male   | Success                                      | Fail    |
| M3170 | M3170 <sup>a</sup>   | Tomb master     | 20-25 | Male   | Female | Success                                      | Fail    |
| M3199 | M3199                | Tomb master     | 20    | Female | Female | No consistent result obtained by replication | -       |
| M3218 | M3218                | Tomb master     | 30    | Male   | Fail   | Success                                      | -       |
| M3267 | M3267                | Tomb master     | 30    | Female | Female | Success                                      | -       |
| M3327 | M3327                | Tomb master     | 16-17 | Male   | Male   | Success                                      | Success |
| M3336 | M3336                | Tomb master     | 20    | Male   | Male   | Success                                      | Success |
| M3349 | M3349 <sup>a</sup>   | Tomb master     | 45-50 | Male   | Male   | Success                                      | Success |
| M3374 | M3374                | Tomb master     | 30    | Male   | Male   | Success                                      | Success |
| M3379 | M3379                | Tomb master     | 30    | Female | Female | Success                                      | -       |

<sup>a</sup> The samples were replicated independently at Fudan University.

<sup>b</sup> mtDNA HVR-I segments cloned from samples.

-, not analyzed; ?, unknown.
