# Supplementary material for: Ancient DNA Reveals That the Genetic Structure of the Northern Han Chinese Was Shaped Prior to 3,000 Years Ago
Source: PubMed Central journal article supplement (PMC4418768; doi:10.1371/journal.pone.0125676), 2015-05-04
Supplement: pone.0125676.s006.pdf [file pone.0125676.s006.pdf]

Table S2 Primers used in this study.

| mtDNA<br>fragments/<br>haplogroups | HVR-I<br>Primers                                                                                                                             | Sites                                     | Length (bp)           |
|------------------------------------|----------------------------------------------------------------------------------------------------------------------------------------------|-------------------------------------------|-----------------------|
| HVR I-a                            | L16017 5'-TTCTCTGTTCTTTCATGGGGA-3'<br>H16251 5'-GGAGTTGCAGTTGATGTGTGA-3'                                                                     |                                           | 235 bp                |
| HVR I-b                            | L16201 5'-CAAGCAAGTACAGCAATCAAC-3'<br>H16409 5'-AGGATGGTGGTCAAGGGA-3'                                                                        |                                           | 209 bp                |
| 393bp                              | L16017 5'-TTCTCTGTTCTTTCATGGGGA-3'<br>H16409 5'-AGGATGGTGGTCAAGGGA-3'                                                                        |                                           | 393bp                 |
| A                                  | L587 5'-TTACCTCCTCAAAGCAATACA-3'<br>H761 5'-CTTGATGCTTGTCCTTTT-3'                                                                            | 663G/A                                    | 175 bp                |
| B                                  | L587 5'-TTACCTCCTCAAAGCAATACA-3'<br>H761 5'-CTTGATGCTTGTCCTTTT-3'                                                                            | CoII/tRNA <sup>lys</sup><br>9-bp deletion | 121 bp/112 bp (B)     |
| C                                  | L14318T 5'-CCTTCATAAATTATTCAGCTTCCaACACTAT-3'<br>L14318C<br>5'-aaaaagctaCATAAATTATTCAGCTTCTACTACTAC-3'<br>H14318R 5'-TTAGTGGGGTTAGCGATGGA-3' | 14318C/T                                  | 110 bp/115 bp (C)     |
| D                                  | 5178A 5'-TGATCAACGCACCTGAAACAAGA-3'<br>5178C 5'-GTCGCACCTGAAGCAAGC-3'<br>5178R 5'-CCCATTTGAGCAAAAAGCC-3'                                     | 5178A/C                                   | 107 bp (D)/102 bp     |
| D4                                 | 3010A 5'-gctacaTGGATCAGGACAaCCCA-3'<br>3010G 5'-aTTGGATCAGGACtTCCCG-3'<br>3010R 5'-tTCCGGTCTGAACTCAGATC-3'                                   | 3010A/G                                   | 95 bp (D4)/91 bp      |
| D5                                 | L10262 5'-ATTGCCCTCCTTTTACCCTAC-3'<br>H10475 5'-GGGGCATTGGTAAATATGATTATC-3'                                                                  | 10397G/A                                  | 214 bp                |
| F                                  | 3970T 5'-taaaaTGTATTTCGGCTATGAAGAtTAA-3'<br>3970C 5'-GTGTATTTCGGCTATGAAGtATAG-3'<br>3970R 5'-AGTCTCAGGCTTCAACATCG-3'                         | 3970T/C                                   | 70 bp (F)/66 bp       |
| G                                  | 4833A 5'-tcaaaaCAGAGGTTACCCtAGGCA-3'<br>4833G 5'-CAGAGGTTACCCAtGGCG-3'<br>4833R 5'-CTTACGTTTGTGAGGGAGAG-3'                                   | 4833G/A                                   | 114 bp/109 bp (G)     |
| M                                  | 10400T 5'-taattaTACAAAAAGGATTAGACTGtgCT-3'<br>10400C 5'-TACAAAAAGGATTAGACaGAACC-3'<br>10400R 5'-GAAAGTGAGATGGTAAATGCTAG-3'                   | 10400T/C                                  | 149 bp (M)/142 bp     |
| M7                                 | 6455T 5'-acTGTGATTAGGACGGATCtGACA-3'<br>6455C 5'-GATTAGGACGGAaCAGACG-3'<br>6455F 5'-TAGGaGCCATCAATTCATC-3'                                   | 6455T/C                                   | 100 bp (M7)/95 bp     |
| M8                                 | L15390 5'-CGATAAAATCACCTTCCACCCT-3'<br>H15570 5'-TAGGAAATATCATTCGGGCTTG-3'                                                                   | 15487T/A                                  | 181 bp                |
| M9                                 | 3394C 5'-CGAACGAAAAATTCTTGCC-3'<br>3394T 5'-AATACGAACGAAAAATACTAGGCT-3'<br>3394R 5'-GTCAGCGAAGGGTTGTAG-3'                                    | 3394C/T                                   | 88 bp (M9)/84 bp (M9) |
| M10                                | L10600 5'-CTACTCTCATAACCCtCAAC-3'                                                                                                            | 10646A/G                                  | 163 bp                |

|     |                                   |          |        |
|-----|-----------------------------------|----------|--------|
|     | H10762 5'-CATTGGAGTAGGTTTAGG-3'   |          |        |
| N9a | L5334 5'-AACCTCTACTTCTACCTACG-3'  | 5417A/G  | 164 bp |
|     | H5497 5'-ATAAAAAGGGGAGATAGGTAG-3' |          |        |
| R   | L12604 5'-ATCCCTGTAGCATTGTTTCG-3' | 12705C/T | 151 bp |
|     | H12754 5'-GTTGGAATAGGTTGTTAGCG-3' |          |        |
| Z   | L48 5'-CATTTGGTATTTTCGTCTGGG-3'   | 152C/T   | 158 bp |
|     | H205 5'-CGCTTTGGTAAGTATGTTCCG-3'  |          |        |

---
